# Supplementary material for: Chronic oxidative stress promotes H2AX protein degradation and enhances chemosensitivity in breast cancer patients
Source: PubMed Central journal article supplement (PMC5123617; doi:10.15252/emmm.201505891), 2016-03-22
Supplement: EMMM-8-527-s001.pdf [file EMMM-8-527-s001.pdf]

## APPENDIX

### **Chronic oxidative stress promotes H2AX protein degradation and enhances chemosensitivity in breast cancer patients**

Gruosso Tina<sup>1,2, §</sup>, Mieulet Virginie<sup>1,2, §</sup>, Cardon Melissa<sup>1,2</sup>, Bourachot Brigitte<sup>1,2</sup>, Kieffer Yann<sup>1,2</sup>, Devun Flavien<sup>3</sup>, Dubois Thierry<sup>4</sup>, Dutreix Marie<sup>3</sup>, Vincent-Salomon Anne<sup>5</sup>, Miller Kyle M.<sup>6</sup>  
and Mehta-Grigoriou Fatima<sup>1,2\*</sup>

Running title: Role of H2AX down-regulation by ROS in cancer

## TABLE OF CONTENT

**Figure S1:** Evaluation of DDR proteins in cells with chronic stress

**Figure S2:** *H2afx* mRNA, miRNA regulation of H2AX and impact of protein synthesis or proteasome inhibitors on H2AX protein levels.

**Table S1:** Semi-quantitative expression profiling of proteins involved in cell cycle and DNA damage pathway

**Table S2:** List of genes involved in oxidative stress response and up-regulated in low- *versus* high-H2AX TN breast tumours

**Table S3:** List of genes involved in oxidative stress response and up-regulated in low- *versus* high-H2AX HER2 breast tumours

### Figure S1: Evaluation of DDR proteins in cells with chronic stress

- A** Up, Representative western blots from whole cell extract showing  $\gamma$ -H2AX protein levels in *wt* and *cat<sup>-/-</sup>* fibroblasts, after H<sub>2</sub>O<sub>2</sub> exposure for the indicated times (hours, h). Actin is used as internal control for protein loading. Down, Bar plots showing  $\gamma$ -H2AX and H2AX protein levels, as well as the ratio  $\gamma$ -H2AX/H2AX as assessed by densitometry analysis of western blots (as shown above). Data are shown as means  $\pm$  s.e.m.. NS stands for not significant and P-values are based on paired t-test showing the difference between *wt* and *cat<sup>-/-</sup>* fibroblasts.
- B,C** Bar-plots showing levels of several DNA-damage proteins in *wt* and *junD<sup>-/-</sup>* (**B**) and *Nfe2l2<sup>-/-</sup>* (**C**) fibroblasts, as assessed by Reverse Phase Protein Array (RPPA). Data are shown as means  $\pm$  s.e.m. from n=3 independent experiments. NS stands for not significant and P-values are based on Student's t-test.

### Figure S2: *H2afx* mRNA, miRNA regulation of H2AX and impact of protein synthesis or proteasome inhibitors on H2AX protein levels.

- A** Bar plots showing *H2afx* mRNA levels in *wt* and *junD<sup>-/-</sup>* fibroblasts, as assessed by qRT-PCR analysis.
- B** Bar plots showing miR-24 and miR-138 levels in *wt* and *junD<sup>-/-</sup>* fibroblasts, as assessed by qRT-PCR analysis.
- C** Bar plots showing the indicated *in silico* predicted H2AX-targeting miRNA levels in *wt* and *junD<sup>-/-</sup>* fibroblasts, as assessed by qRT-PCR analysis.
- D** Up, Representative western blot from whole cell extracts showing H2AX protein levels in *wt* and *junD<sup>-/-</sup>* fibroblasts, under untreated conditions (-) or after 8h of treatment (+) by the protein translation inhibitor Cycloheximide (CHX). Down, bar plots showing H2AX protein levels as assessed by densitometry analysis of western blots (as shown above).
- E** Up, Representative western blot from whole cell extracts showing H2AX protein levels in *wt* and *junD<sup>-/-</sup>* fibroblasts, under untreated conditions (-) or after 8h of treatment (+) by

- proteasome inhibitor MG132. Down, Bar plots showing H2AX protein levels as assessed by densitometry analysis of western blots (as shown above).
- F** Up, Representative western blot from chromatin-free fraction or whole cell extracts, showing H2AX protein levels in *wt* and *Nfe2l2*<sup>-/-</sup> fibroblasts. Two different exposures (low or high) and amounts of loaded proteins are presented, H2AX being easier to detect when associated with chromatin. Down, bar plots showing H2AX protein levels as assessed by densitometry analysis of western blots (as shown above).
- G** Up, Representative western blot from chromatin-free fraction extracts showing H2AX protein levels in *wt* and *junD*<sup>-/-</sup> fibroblasts, under untreated conditions (-) or after 8h of treatment (+) by the protein translation inhibitor Cycloheximide (CHX). Down, Bar plots showing H2AX protein levels as assessed by densitometry analysis of western blots (as shown above).
- H** Representative western blots from whole cell extracts showing HA-tagged ubiquitin (Left) or Flag-tagged H2AX (Right) protein levels. *wt* and *junD*<sup>-/-</sup> fibroblasts were co-transfected with vectors encoding HA-tagged ubiquitin and Flag-tagged wild-type H2AX (FLAG-H2AX WT) or empty vector, as indicated. Flag-tagged H2AX proteins were then immunoprecipitated with Flag-specific antibody and incubated either with HA-specific antibody (Left) or Flag-specific antibody (Right).
- I** Bar plots showing mRNA levels of RNF168, RNF8 and BMI1 in *junD*-deficient fibroblasts after transfection of a siRNA control, or directed against the indicated protein.

For all panels, data are shown as means  $\pm$  s.e.m. (n=3 independent experiments) NS stands for not significant and P-values are based on Student's t-test. Jun is used as positive control for treatment efficiency (D,E,G). Actin is used as internal control for protein loading (D-G).

**Table S1: Semi-quantitative expression profiling of proteins involved in cell cycle and DNA damage pathway**

Results are shown as fluorescent intensity means (each antibody being coated in sixplicates on the slides) after hybridization of the slices with protein lysates from *control*, *junD*- and *Nfe2l2*-deficient fibroblasts.

**Table S2: List of genes involved in oxidative stress response and up-regulated in low-versus high-H2AX TN breast tumours**

Genes presented belong to the following gene ontology pathways: “response to stress” ( $P = 3.10^{-7}$ ; Fold enrichment 2.1) and “NADPH oxidase complex” ( $P = 1.10^{-4}$ ; Fold enrichment 35.7). These genes are significantly up-regulated in TN BC with low H2AX protein levels, compared to TN tumours with high H2AX protein levels. Subgroups of patients were defined by the median value of H2AX histological scores (Hscores) in the epithelial compartment. Differentially expressed genes were defined by Welch’s t test as indicated in the Methods section. BP = Biological Processes, CC = Cellular Components from the DAVID Gene Ontology analyses.

**Table S3: List of genes involved in oxidative stress response and up-regulated in low-versus high-H2AX HER2 breast tumours**

Genes presented belong to the following gene ontology pathways: “response to stress” ( $P = 3.10^{-11}$ ; Fold enrichment 2.4), “superoxide anion generation” ( $P = 0.01$ ; Fold enrichment 15.9), “response to oxidative stress” ( $P = 0.03$ ; Fold enrichment 2.9) and “NADPH oxidase complex” ( $P = 0.006$ ; Fold enrichment 24.2). Genes are significantly up-regulated in HER2 BC with low H2AX protein levels, compared to HER2 tumors with high H2AX protein levels. Subgroups of patients (Low- versus High-H2AX protein levels) were defined by the median value of H2AX histological scores (Hscores) in the epithelial compartment. Differentially expressed genes were defined by Welch’s t test as indicated in the Methods section. BP = Biological Processes, CC = Cellular Components from the DAVID Gene Ontology analyses.

**Table S4: List of genes involved in oxidative stress response and up-regulated after chemotherapy in TN breast tumours**

Genes presented belong to the following gene ontology pathways: “oxidation reduction” (P = 0.001; Fold enrichment = 2.1), “response to oxidative stress” (P = 0.02; Fold enrichment = 3.0) and “oxidoreductase activity” (P =  $5.10^{-4}$ ; Fold enrichment = 2.2). Genes are significantly up-regulated in TN BC after chemotherapy, compared to the corresponding biopsies before treatment. Differentially expressed genes per patient were defined by Paired t-test as indicated in the Methods section. BP = Biological Processes, MF = Molecular Functions from the DAVID Gene Ontology analyses.

**A**

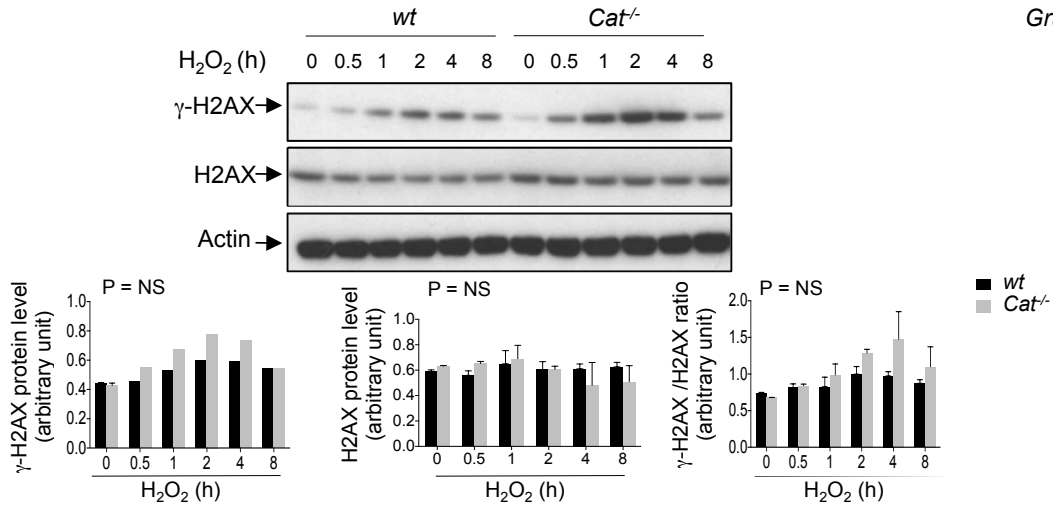

**B**

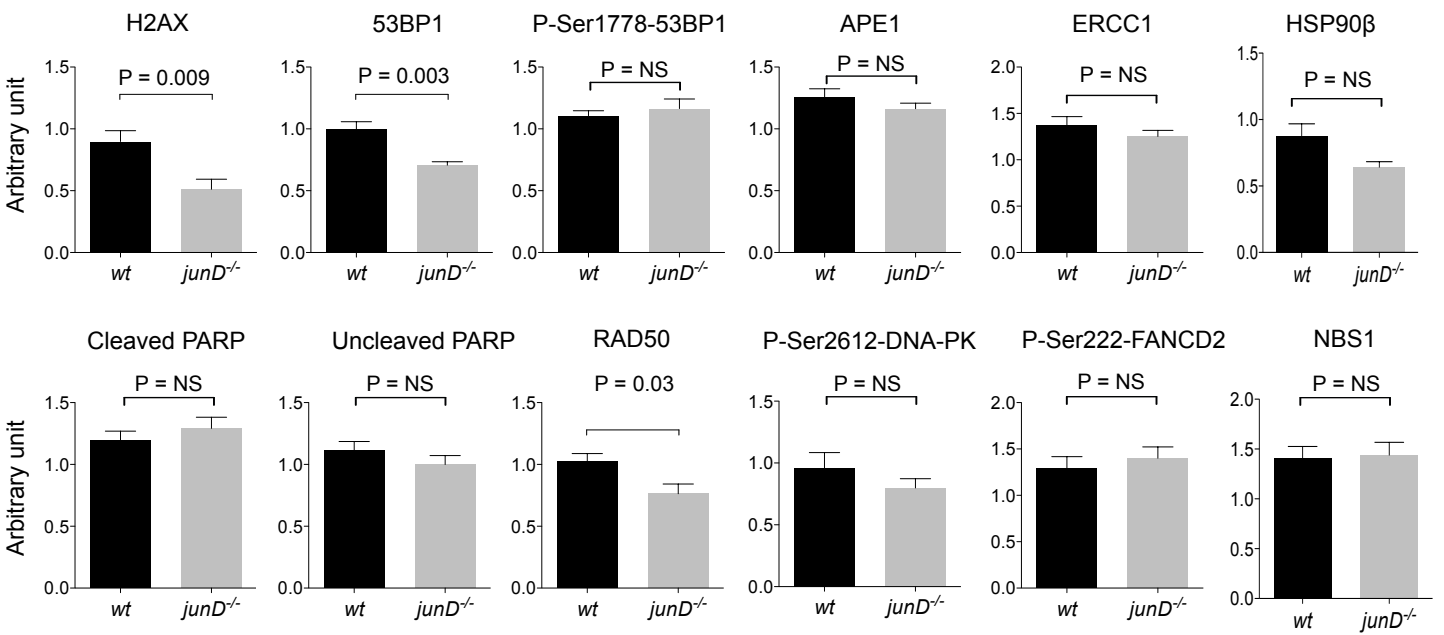

**C**

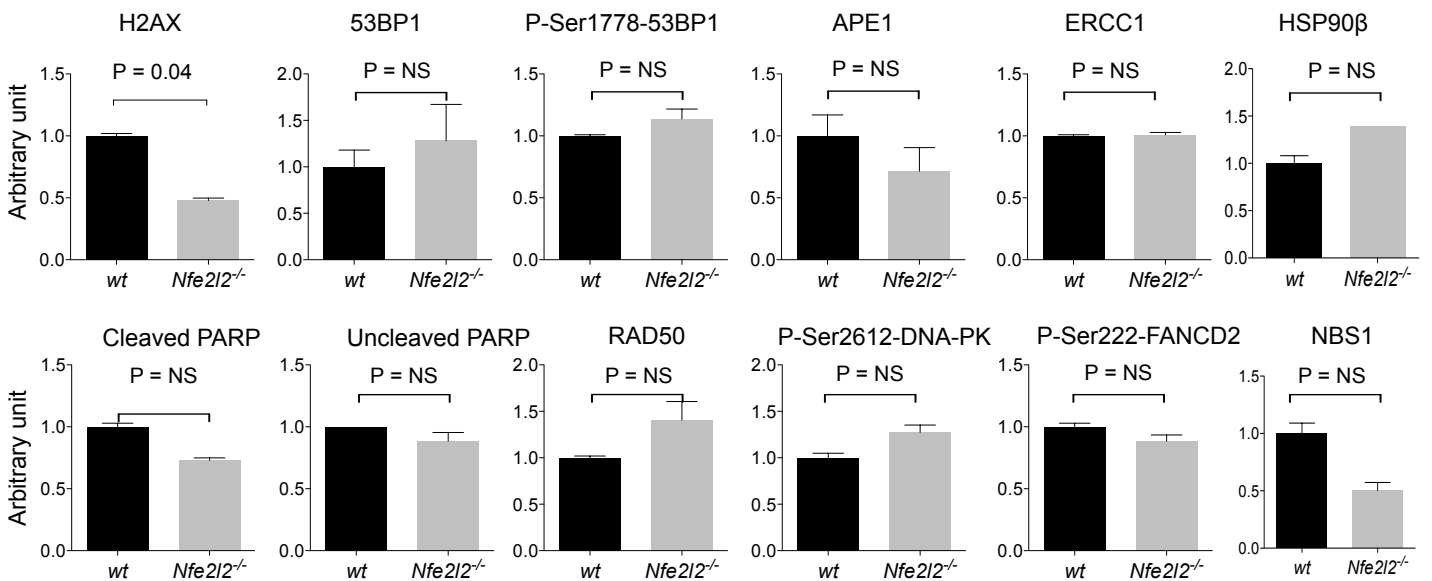

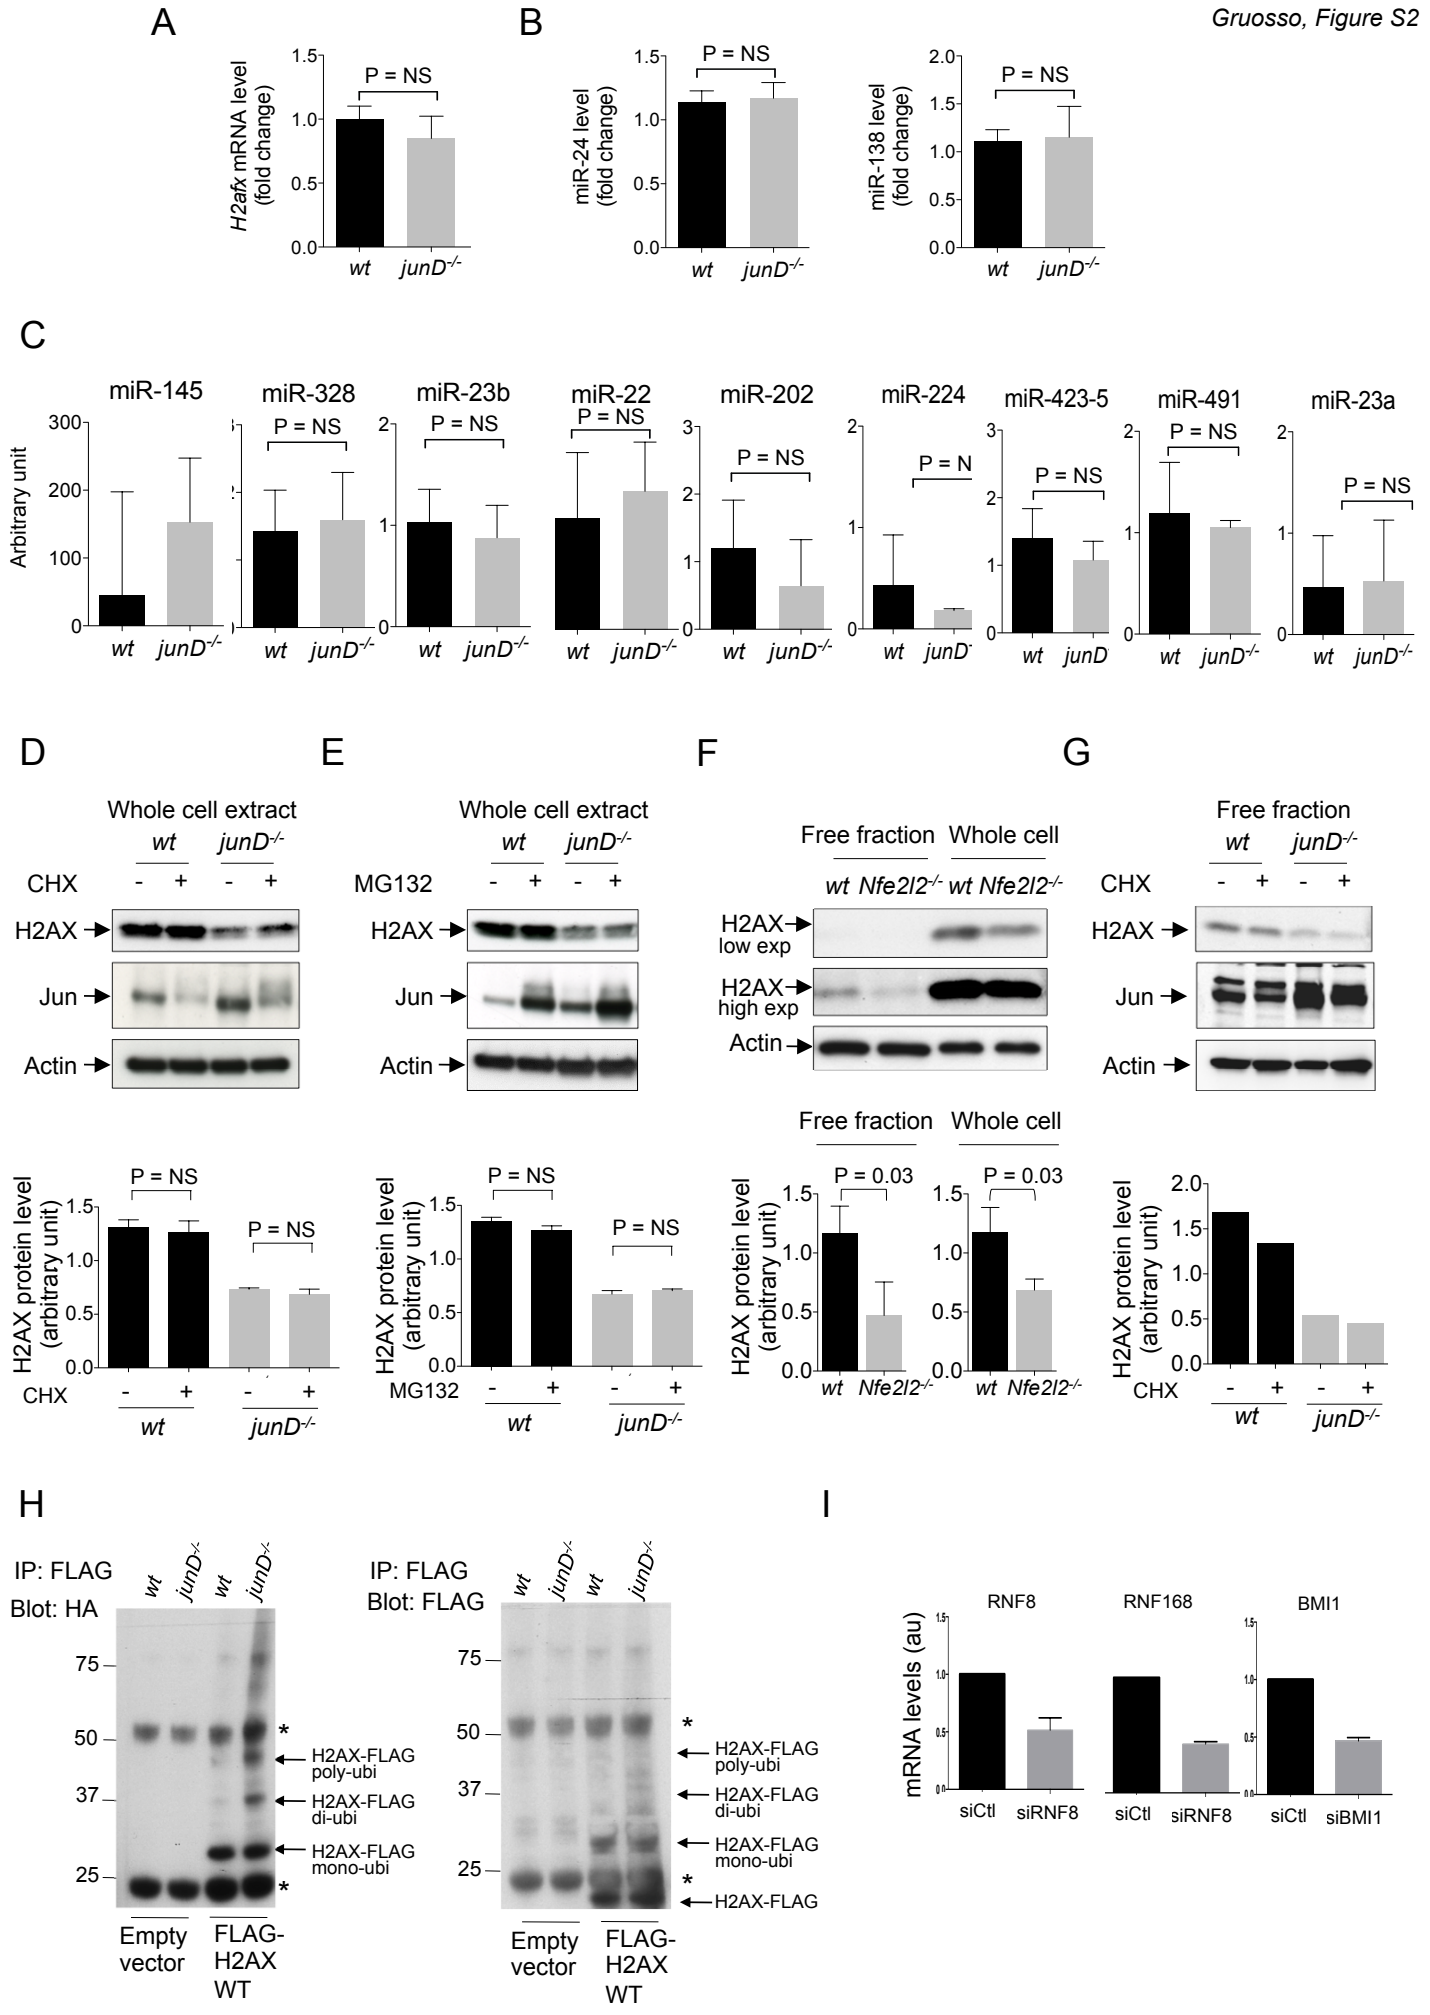



| Name                       | Normalized Intensity values |            |            | p-value (adjusted t-test) |                         |
|----------------------------|-----------------------------|------------|------------|---------------------------|-------------------------|
|                            | wt                          | junD-/-    | Nrf2-/-    | p-value (wt vs junD-/-)   | p-value (wt vs Nrf2-/-) |
| ABI1(Phospho)              | 14,570169                   | 19,183612  | 29,165935  | NS                        | NS                      |
| ABL1                       | 38,825043                   | 115,352147 | 107,479713 | NS                        | NS                      |
| ABL1(Phospho)              | 10,972764                   | 13,825802  | 10,492690  | NS                        | NS                      |
| AKT                        | 11,068158                   | 12,708612  | 12,858452  | NS                        | NS                      |
| AKT1                       | 19,059413                   | 19,617469  | 11,765275  | NS                        | NS                      |
| AKT1(Phospho)              | 17,051276                   | 17,925411  | 23,762079  | NS                        | NS                      |
| ATRIP(Phospho)             | 14,384715                   | 7,989955   | 15,381367  | NS                        | NS                      |
| BRCA1                      | 17,387204                   | 33,171339  | 44,121863  | NS                        | NS                      |
| BRCA1(Phospho)             | 19,066176                   | 16,649107  | 19,309036  | NS                        | NS                      |
| c-Abl                      | 20,429413                   | 21,362641  | 21,839632  | NS                        | NS                      |
| c-Abl(Phospho)             | 18,387843                   | 17,412363  | 17,163460  | NS                        | NS                      |
| CDC2(Phospho)              | 31,748177                   | 33,040959  | 33,747773  | NS                        | NS                      |
| CDC25A                     | 12,274945                   | 6,701064   | 13,831808  | NS                        | NS                      |
| CDC25B                     | 10,534465                   | 4,394396   | 7,307709   | NS                        | NS                      |
| CDC25B(Phospho)            | 18,846597                   | 12,534784  | 7,545197   | NS                        | NS                      |
| CDK1/CDC2                  | 18,180933                   | 19,823805  | 18,199311  | NS                        | NS                      |
| CDK1/CDC2(Phospho)         | 18,838668                   | 17,206566  | 8,656322   | NS                        | 0,0022                  |
| CDK2                       | 14,709832                   | 10,518644  | 35,513785  | NS                        | 0,0000                  |
| CDK2(Phospho)              | 15,890758                   | 13,744068  | 11,041827  | NS                        | NS                      |
| CDK7                       | 18,316714                   | 16,054018  | 15,400822  | NS                        | NS                      |
| CDK7(Phospho)              | 12,135474                   | 8,541636   | 32,926760  | NS                        | 0,0139                  |
| Chk1                       | 16,495485                   | 18,739432  | 18,884817  | NS                        | NS                      |
| Chk2(Phospho)              | 17,906086                   | 15,628904  | 26,894005  | NS                        | 0,0000                  |
| CyclinB1                   | 18,569440                   | 15,719304  | 17,463048  | NS                        | NS                      |
| CyclinB1(phospho)          | 20,880737                   | 18,701531  | 23,418518  | NS                        | NS                      |
| CyclinD2                   | 13,676759                   | 18,546615  | 15,937898  | NS                        | NS                      |
| CyclinD3(Phospho)          | 23,733063                   | 22,864078  | 9,219745   | NS                        | NS                      |
| CyclinE1                   | 32,182571                   | 60,303847  | 83,284836  | NS                        | NS                      |
| CyclinE1(Phospho)          | 20,534070                   | 21,786599  | 20,095733  | NS                        | NS                      |
| CyclinE2                   | 13,818017                   | 16,822858  | 18,227561  | NS                        | 0,0171                  |
| DNA-PK                     | 14,884427                   | 17,300817  | 25,172397  | NS                        | NS                      |
| DNA-PK(Phospho)            | 14,790438                   | 15,005581  | 5,501996   | NS                        | 0,0000                  |
| E2F1(Phospho)              | 22,327201                   | 10,910594  | 20,946396  | NS                        | NS                      |
| E2F2(inter)                | 21,328324                   | 23,098647  | 30,331192  | NS                        | NS                      |
| E2F6(inter)                | 16,451407                   | 21,075496  | 21,363292  | NS                        | NS                      |
| Empty                      | 1,380778                    | 2,168422   | 2,019129   | NS                        | NS                      |
| FKHR                       | 20,022499                   | 17,229830  | 13,580895  | NS                        | NS                      |
| FKHR(Phospho)              | 19,907507                   | 13,500409  | 19,991203  | NS                        | NS                      |
| FKHRL1(Phospho)            | 15,580238                   | 18,241868  | 30,595889  | NS                        | 0,0113                  |
| FOXO1/3/4-PAN              | 20,691806                   | 23,819765  | 17,344806  | NS                        | NS                      |
| FOXO1/3/4-PAN(Phospho)     | 23,431068                   | 21,281794  | 30,445125  | NS                        | 0,0472                  |
| FOXO1A                     | 16,707324                   | 17,991352  | 8,827546   | NS                        | 0,0026                  |
| FOXO1A(Phospho)            | 17,627380                   | 17,024495  | 27,307527  | NS                        | NS                      |
| GAPDH                      | 0,997305                    | 4,307140   | 0,757822   | NS                        | NS                      |
| GSK3a-b(Phospho)           | 17,282737                   | 17,265690  | 8,132958   | NS                        | 0,0000                  |
| GSK3beta(Phospho)          | 21,030282                   | 16,397667  | 31,505745  | NS                        | 0,0787                  |
| HDAC2                      | 21,773814                   | 17,492594  | 25,423131  | NS                        | NS                      |
| HDAC2(Phospho)             | 19,107348                   | 24,964956  | 32,292765  | NS                        | 0,0008                  |
| HDAC3(Phospho)             | 21,902094                   | 18,829331  | 28,869829  | NS                        | NS                      |
| HDAC4                      | 10,268690                   | 14,879784  | 10,884818  | NS                        | NS                      |
| HDAC4(Phospho)             | 9,837225                    | 21,353551  | 18,911452  | NS                        | NS                      |
| HDAC5                      | 14,633107                   | 18,709081  | 13,297819  | NS                        | NS                      |
| HDAC5(Phospho)             | 23,242756                   | 14,110982  | 31,467551  | NS                        | NS                      |
| HDAC6(Phospho)             | 13,374574                   | 23,882008  | 30,964935  | NS                        | NS                      |
| HDAC7(C-term)              | 16,296600                   | 13,794256  | 7,427458   | NS                        | 0,0007                  |
| HDAC8                      | 9,848155                    | 10,299943  | 20,149720  | NS                        | 0,0000                  |
| HDAC8(Phospho)             | 19,496569                   | 16,904322  | 25,476293  | NS                        | 0,0332                  |
| MDM2(Phospho)              | 21,181994                   | 20,848553  | 23,416113  | NS                        | 0,0342                  |
| Myc                        | 16,511130                   | 12,034678  | 19,840476  | NS                        | NS                      |
| MYT1                       | 21,103792                   | 23,140245  | 18,455860  | NS                        | NS                      |
| P15INK(C-term)             | 23,809788                   | 26,031572  | 28,090419  | NS                        | NS                      |
| p18INK(inter)              | 18,960542                   | 15,886006  | 6,303051   | NS                        | 0,0001                  |
| p21Cip1                    | 8,511231                    | 7,225121   | 18,802651  | NS                        | 0,0000                  |
| p21Cip1(Phospho)           | 18,088563                   | 13,833004  | 3,569915   | NS                        | 0,0493                  |
| p27Kip1                    | 10,667017                   | 10,938018  | 3,750292   | NS                        | NS                      |
| p27Kip1(Phospho)           | 18,966328                   | 20,684393  | 26,569003  | NS                        | NS                      |
| p300(N-term)               | 19,540170                   | 14,124463  | 23,795462  | NS                        | NS                      |
| p300/CBP(C-term)           | 17,478288                   | 13,772571  | 7,489702   | NS                        | 0,0038                  |
| p53                        | 17,453094                   | 17,362522  | 18,835998  | 0,0501                    | 0,0185                  |
| p53(Phospho)               | 23,156054                   | 19,848071  | 28,948549  | NS                        | 0,0000                  |
| P90RSK                     | 23,884584                   | 37,759153  | 42,127265  | NS                        | NS                      |
| PLK1                       | 18,210295                   | 24,965341  | 46,721990  | NS                        | 0,0000                  |
| PP2A-a(Phospho)            | 18,839430                   | 25,078351  | 28,780412  | NS                        | 0,0345                  |
| RAD51                      | 23,090116                   | 27,093798  | 17,785538  | NS                        | NS                      |
| RAD51(Phospho)             | 17,551441                   | 18,837150  | 24,581872  | NS                        | NS                      |
| RAD52(Phospho)             | 21,711115                   | 18,826712  | 20,675417  | NS                        | NS                      |
| Rb                         | 15,886352                   | 19,423881  | 21,352775  | NS                        | 0,0195                  |
| Rb(Phospho)                | 18,240418                   | 14,054439  | 14,822179  | NS                        | 0,0438                  |
| Smad3                      | 18,217153                   | 20,750989  | 18,013800  | NS                        | NS                      |
| Smad3(Phospho)             | 17,124858                   | 20,246877  | 13,108144  | 0,0531                    | NS                      |
| Smad4(inter)               | 9,515085                    | 7,133488   | 11,015730  | NS                        | NS                      |
| SMC1                       | 13,806944                   | 14,833410  | 2,678488   | NS                        | 0,0004                  |
| SMC1(Phospho)              | 19,049745                   | 10,612856  | 34,956858  | NS                        | NS                      |
| TGFbeta1(inter)            | 19,128375                   | 19,673627  | 16,904685  | NS                        | NS                      |
| TGFbeta2(inter)            | 15,537899                   | 27,759952  | 42,101492  | NS                        | 0,0004                  |
| TGFbeta3(inter)            | 16,722659                   | 14,089028  | 6,715784   | NS                        | 0,0054                  |
| TGFbetareceptorII(inter)   | 12,809210                   | 13,862239  | 18,773180  | NS                        | NS                      |
| TGFBR1                     | 19,839688                   | 23,390838  | 14,991608  | NS                        | NS                      |
| TOP2A/DNATopoisomerasell   | 21,925454                   | 24,282317  | 26,794573  | NS                        | NS                      |
| Topoisomerasellbeta(inter) | 18,757585                   | 17,193971  | 16,641029  | NS                        | NS                      |
| WEE1(Phospho)              | 19,849094                   | 17,716802  | 11,620901  | NS                        | 0,0093                  |
| 14-3-3theta/tau(Phospho)   | 19,619800                   | 20,686550  | 10,898745  | NS                        | 0,0000                  |
| 14-3-3zeta                 | 16,729351                   | 12,287427  | 9,642600   | NS                        | NS                      |
| 14-3-3zeta(Phospho)        | 24,138238                   | 18,375407  | 16,156002  | NS                        | NS                      |
| 14-3-3zeta/delta(Phospho)  | 19,747461                   | 18,740819  | 22,746581  | NS                        | NS                      |

| Gene Symbol | Gene name                                          | Function                                                                                          | P     | fold | included in |
|-------------|----------------------------------------------------|---------------------------------------------------------------------------------------------------|-------|------|-------------|
| CD44        | CD44 molecule                                      | Receptor for collagens and matrix metalloproteinases involved in cell adhesion and migration.     | 0.004 | 2.0  | BP          |
| ARHGEF6     | Rac/Cdc42 guanine nucleotide exchange factor 6     | RhoGTPases that activates Rho proteins in many cellular processes.                                | 0.004 | 1.9  | BP          |
| CYBA        | cytochrome b-245, alpha polypeptide                | Cytochrome b component 1 of 2, a component of the NADPH oxidase in phagocytes.                    | 0.005 | 1.7  | BP, CC      |
| DUSP10      | dual specificity phosphatase 10                    | Phosphatase that inactivates p38 and SAPK/JNK, but not MAPK/ERK.                                  | 0.005 | 1.6  | BP          |
| GADD45A     | growth arrest and DNA-damage-inducible, alpha      | Activation of the p38/JNK pathway following stressful growth arrest and DNA damage.               | 0.005 | 1.7  | BP          |
| NCF4        | neutrophil cytosolic factor 4                      | Cytosolic regulatory component of the superoxide-producing phagocyte NADPH-oxidase.               | 0.006 | 2.2  | CC          |
| CXCR4       | chemokine (C-X-C motif) receptor 4                 | CXC chemokine receptor specific for CXCL12/SDF1.                                                  | 0.007 | 3.0  | BP          |
| FEN1        | flap structure-specific endonuclease 1             | Endonuclease processing overhanging flaps in DNA repair and Okazaki fragments.                    | 0.007 | 1.6  | BP          |
| PDLIM1      | PDZ and LIM domain 1                               | Adapter to bring other LIM-interacting proteins to the cytoskeleton.                              | 0.007 | 1.5  | BP          |
| STAT3       | signal transducer and activator of transcription 3 | Transcription factor which plays a key role in cell growth and apoptosis after stress stimuli.    | 0.009 | 1.6  | BP          |
| B4GALT1     | beta 1,4-galactosyltransferase,peptide 1           | Enzyme that participates both in glycoconjugate and lactose biosynthesis.                         | 0.01  | 1.6  | BP          |
| CD38        | CD38 molecule                                      | Multifunctional enzyme implicated in cell adhesion and signalling.                                | 0.01  | 3.7  | BP          |
| NFX1        | nuclear transcription factor, X-box binding 1      | Transcriptional repressor that may regulate the duration of an inflammatory response.             | 0.01  | 1.5  | BP          |
| SLAMF7      | SLAM family member 7 (also known CS1)              | Isoform1 mediates NK cell activation through ERK-mediated pathway.                                | 0.01  | 2.3  | BP          |
| BCL3        | B-cell CLL/lymphoma 3                              | Transcriptional co-activator involved in the regulation of NF-kappa B activation.                 | 0.02  | 1.7  | BP          |
| CCL18       | chemokine (C-C motif) ligand 18                    | Chemotactic activity for naive T cells, CD4+ and CD8+ T cells and nonactivated lymphocytes.       | 0.02  | 3.8  | BP          |
| CCL2        | chemokine (C-C motif) ligand 2                     | CXC cytokine that has chemotactic activity for monocytes and basophils.                           | 0.02  | 2.0  | BP          |
| C5AR1       | complement component 5a receptor 1                 | Signal transducer in inflammation, particularly in IL12 and TNFA production in monocytes.         | 0.02  | 1.6  | BP          |
| CYBB        | cytochrome b-245, beta polypeptide                 | Cytochrome b component 2 of 2, a component of the NADPH oxidase inphagocytes.                     | 0.02  | 1.9  | BP, CC      |
| LYZ         | lysozyme                                           | Anti-microbial agent whose natural substrate is the bacterial cell wall peptidoglycan.            | 0.02  | 4.6  | BP          |
| MAP3K13     | mitogen-activated protein 3(kinase) 13             | Activation of MAPK8/JNK, MAP2K7/MKK7, which suggests a role in the JNK signaling pathway.         | 0.02  | 1.7  | BP          |
| NCF1        | neutrophil cytosolic factor 1                      | Cytosolic subunit of neutrophil NADPH oxidase that produces superoxide anion.                     | 0.02  | 1.9  | BP          |
| NCF1C       | neutrophil cytosolic factor 1C pseudogene          | NCF1 pseudogene unlikely to express a protein.                                                    | 0.02  | 1.8  | BP, CC      |
| POLH        | polymerase (DNA directed), eta                     | DNA polymerase which replicates UV-damaged DNA ; suppressing its mutagenic effect.                | 0.02  | 1.5  | BP          |
| RAD51L1     | RAD51 homolog B                                    | Binds to RAD51C and is involved in the homologous recombination DNA repair.                       | 0.02  | 2.1  | BP          |
| SERPINA3    | serpin peptidase inhibitor clade A member 3        | Plasma protease inhibitor that can inhibit convertases of angiotensin-1 into active angiotensin-2 | 0.02  | 5.9  | BP          |
| SOD2        | superoxide dismutase 2, mitochondrial              | Antioxidant, superoxide radicals dismutation into hydrogen peroxide and oxygen                    | 0.02  | 1.8  | BP          |
| SOCS3       | suppressor of cytokine signaling 3                 | Cytokine-inducible negative regulator of cytokine signaling which inhibits JAK2.                  | 0.02  | 1.9  | BP          |
| VNN1        | vanin 1                                            | Pantetheinase which may play a role in oxidative-stress response.                                 | 0.02  | 1.9  | BP          |
| BCL6        | B-cell CLL/lymphoma 6                              | Transcription repressor involved in B lymphocyte maturation                                       | 0.03  | 1.6  | BP          |
| BRIP1       | BRCA1 interacting protein C-terminal helicase 1    | RecQ DEAH helicase important for the double-strand break repair function of BRCA1.                | 0.03  | 2.0  | BP          |
| CD40        | CD40                                               | TNF receptor involved in immune and inflammatory response.                                        | 0.03  | 1.7  | BP          |
| ERN1        | endoplasmic reticulum to nucleus signaling 1       | Endoribonuclease which modulates gene expressionin response to ER stress.                         | 0.03  | 1.5  | BP          |
| ERRF1       | ERBB receptor feedback inhibitor 1                 | Shares homology with a protein product induced during cell stress including growth                | 0.03  | 1.9  | BP          |
| FADS1       | fatty acid desaturase 1                            | Fatty acid desaturase regulating unsaturation of fatty acids.                                     | 0.03  | 1.6  | BP          |
| RAB27A      | RAB27A, member RAS oncogene family                 | Membrane protein involved in protein transport and small GTPase mediated signal transduction.     | 0.03  | 1.6  | BP          |
| SGK3        | serum/glucocorticoid regulated kinase 3            | Role in neutral amino acid transport and activation of potassium and chloride channels.           | 0.03  | 1.7  | BP          |
| TRD@        | T cell receptor delta locus                        | T cell receptor delta chain.                                                                      | 0.03  | 2.0  | BP          |
| CDH3        | cadherin 3, type 1, P-cadherin (placental)         | Calcium-dependent cell-cell adhesion glycoprotein.                                                | 0.04  | 1.9  | BP          |
| C1S         | complement component 1, s subcomponent             | Serine protease in the human complement subcomponent C1.                                          | 0.04  | 2.6  | BP          |
| C3          | complement component 3                             | Activation of complement system against bacterial infection.                                      | 0.04  | 1.8  | BP          |
| IL27RA      | interleukin 27 receptor                            | Regulation of Th1-type immune responses via STAT3 and STAT1.                                      | 0.04  | 2.5  | BP          |
| JAG2        | jagged 2                                           | One of several ligands that activate Notch and related receptors.                                 | 0.04  | 1.6  | BP          |
| TLR1        | toil-like receptor 1                               | Cooperates with TLR2 to mediates immune response to bacterial via NF-kappa-B activation.          | 0.04  | 2.3  | BP          |
| DERL3       | derlin 3                                           | Degradation of misfolded glycoproteins in the ER.                                                 | 0.05  | 2.0  | BP          |
| FANCA       | Fanconi anemia, complementation group A            | DNA repair protein involved in interstrand DNA cross-link repair and chromosome stability         | 0.05  | 1.7  | BP          |
| SAA1        | serum amyloid A1                                   | Amyloid A precursor involved in HDL metabolism and cholesterol metabolism.                        | 0.05  | 2.0  | BP          |
| SAA2        | serum amyloid A2                                   | Amyloid A precursor involved in HDL metabolism and cholesterol metabolism.                        | 0.05  | 2.0  | BP          |
| TLR8        | toil-like receptor 8                               | Participated in immune response to bacterial lipoproteins via NF-kappa-B activation.              | 0.05  | 2.2  | BP          |

| Gene Symbol | Gene name                                           | Function                                                                                    | P     | fold | included in |
|-------------|-----------------------------------------------------|---------------------------------------------------------------------------------------------|-------|------|-------------|
| IL1RN       | interleukin 1 receptor antagonist                   | IL1A and IL1B inhibitor which modulates immune and inflammatory responses                   | 0.002 | 3,2  | BP          |
| MANF        | mesencephalic astrocyte-derived neurotrophic factor | Involved in resistance to ER stress-induced death and cell proliferation                    | 0.002 | 1,6  | BP          |
| C5AR1       | complement component 5a receptor 1                  | Stimulates chemotaxis, granule enzyme release and superoxide anion production               | 0.004 | 1,9  | BP          |
| NOD2        | nucleotide-binding oligomerization domain 2         | Protein involved in immune response to intracellular bacteria                               | 0.004 | 2,0  | BP          |
| VSIG4       | V-set and immunoglobulin domain containing 4        | Receptor for complement fragments and potentially a negative regulator of T-cell responses  | 0.004 | 3,5  | BP          |
| AQP9        | aquaporin 9                                         | Membrane channels which stimulates urea transport and osmotic water permeability            | 0.005 | 1,8  | BP          |
| SIGLEC1     | sialic acid binding Ig-like lectin 1,sialoadhesin   | Lectin-like adhesion molecule that mediates cell-cell interactions                          | 0.006 | 2,7  | BP          |
| RBM3        | RNA binding motif                                   | RNA-binding protein induced by cold shock and low oxygen tension                            | 0.007 | 1,8  | BP          |
| SYT7        | synaptotagmin VII                                   | Synaptotagmin that mediates calcium-dependent regulation of membrane trafficking            | 0.007 | 1,6  | BP          |
| NCF2        | neutrophil cytosolic factor 2                       | NADPH oxidase subunit that generates reactive oxidant intermediates                         | 0.008 | 2,7  | BP, CC      |
| CTSB        | cathepsin B                                         | Lysosomal cysteine proteinase                                                               | 0.01  | 1,6  | BP          |
| CYBA        | cytochrome b-245, alpha polypeptide                 | Cytochrome b component 1 of 2, a component of the NADPH oxidase in phagocytes               | 0.01  | 2,0  | BP, CC      |
| MMP14       | matrix metalloproteinase 14 (membrane-inserted)     | Involved in the breakdown of extracellular matrix in normal physiological processes         | 0.01  | 1,5  | BP          |
| LYN         | v-src-1 Yamaguchi sarcoma oncogene homolog          | Maybe involved in the regulation of mast cell degranulation, and erythroid differentiation  | 0.011 | 2,0  | BP          |
| AKR1B1      | aldo-keto reductase family 1, member B1             | Catalyzes the reduction of a carbonyl-containing compounds to their corresponding alcohols  | 0.02  | 1,7  | BP          |
| CCR1        | chemokine (C-C motif) receptor 1                    | Chemokine receptor involved in inflammation                                                 | 0.02  | 1,7  | BP          |
| CD163       | CD163 molecule                                      | Receptor that protects tissues from free hemoglobin-mediated oxidative damage               | 0.02  | 2,5  | BP          |
| DERL3       | derlin 3                                            | Involved in the degradation of misfolded glycoproteins in the ER                            | 0.02  | 1,6  | BP          |
| HRH1        | histamine receptor H1                               | Messenger molecule released from mast cells, enterochromaffin-like cells, and neurons       | 0.02  | 1,9  | BP          |
| HSPA5       | heat shock 70kDa protein 5                          | Folding, assembly and transport of proteins in the ER                                       | 0.02  | 1,3  | BP          |
| KCNJ8       | potassium channel, subfamily J, member 8            | Potassium channels                                                                          | 0.02  | 1,8  | BP          |
| LBP         | lipopolysaccharide binding protein                  | Acute-phase immunologic response to gram-negative bacterial infections                      | 0.02  | 6,0  | BP          |
| NCF4        | neutrophil cytosolic factor 4                       | NADPH oxidase subunit that generates reactive oxidant intermediates                         | 0.02  | 1,8  | CC          |
| PAPSS2      | 3'-phosphoadenosine 5'-phosphosulfate synthase 2    | Bifunctional enzyme involved in the sulfate activation pathway                              | 0.02  | 2,3  | BP          |
| PKN1        | protein kinase N1                                   | Activated by Rho small G proteins and mediates the Rho-dependent signaling pathway          | 0.02  | 1,6  | BP          |
| PROCR       | protein C receptor, endothelial                     | Receptor for activated protein C involved in the blood coagulation pathway                  | 0.02  | 1,5  | BP          |
| SERPINE1    | serpin peptidase inhibitor, clade E, member 1       | Inhibitor of fibrinolysis                                                                   | 0.02  | 2,1  | BP          |
| TGFB1       | transforming growth factor, beta 1                  | Multifunctional cytokine involved in proliferation, differentiation, adhesion and migration | 0.02  | 1,7  | BP          |
| ARHGEF6     | Rac/Cdc42 guanine nucleotide exchange factor 6      | RhoGTPases that activates Rho proteins in many cellular processes                           | 0.03  | 1,8  | BP          |
| C3AR1       | complement component 3a receptor 1                  | Stimulates chemotaxis, granule enzyme release and superoxide anion production               | 0.03  | 1,7  | BP          |
| CD14        | CD14 molecule                                       | Participates in the innate immune response to bacterial lipopolysaccharide                  | 0.03  | 2,2  | BP          |
| CD40        | CD40 molecule                                       | TNF receptor involved in immune and inflammatory response                                   | 0.03  | 1,5  | BP          |
| CD44        | CD44 molecule                                       | Receptor for collagens and metalloproteinases involved in cell adhesion and migration       | 0.03  | 1,5  | BP          |
| CLU         | clusterin                                           | Secreted chaperone that can under some stress conditions also be found in the cell cytosol  | 0.03  | 2,1  | BP          |
| FCGR1A      | Fc fragment of IgG receptor                         | Related immunoglobulin gamma Fc receptor gene A                                             | 0.03  | 2,2  | BP          |
| IGFBP2      | insulin-like growth factor binding protein 2        | Inhibits IGF-mediated growth and developmental rates                                        | 0.03  | 2,9  | BP          |
| LAMB2       | laminin, beta 2                                     | Membranes constituent involved in cell adhesion, migration, signaling and metastasis        | 0.03  | 2,1  | BP          |
| PDPN        | podoplanin                                          | May be involved in cell migration and/or actin cytoskeleton organization                    | 0.03  | 1,6  | BP          |
| PLA2G4C     | phospholipase A2, group IVC                         | Involved in production of signaling molecules                                               | 0.03  | 1,5  | BP          |
| PLA2G7      | phospholipase A2, group VII                         | Degradation of platelet-activating factor to biologically inactive products                 | 0.03  | 2,6  | BP          |
| PLEK        | pleckstrin                                          | Major protein kinase C substrate of platelets                                               | 0.03  | 1,9  | BP          |
| SLC11A1     | solute carrier family 11 member 1                   | Metal transporter involved in iron metabolism and host resistance to certain pathogens      | 0.03  | 2,0  | BP          |
| SLC1A3      | solute carrier family 1, member 3                   | Transports glutamate and aspartate and act as a symport by cotransporting sodium            | 0.03  | 1,8  | BP          |
| TLR1        | toll-like receptor 1                                | Cooperates with TLR2 to mediate immune response to bacterial via NF-kappa-B activation      | 0.03  | 1,9  | BP          |
| TLR2        | toll-like receptor 2                                | Cooperates with TLR1 to mediate immune response to bacterial via NF-kappa-B activation      | 0.03  | 2,1  | BP          |
| ANXA1       | annexin A1                                          | Phospholipase inhibitory activity involved in exocytosis and probably anti-inflammatory     | 0.04  | 2,1  | BP          |
| C1QA        | complement component 1, q subcomponent, A chain     | C1q subcomponent, itself component of the serum complement system                           | 0.04  | 2,3  | BP          |
| C1QB        | complement component 1, q subcomponent, B chain     | C1q subcomponent, itself component of the serum complement system                           | 0.04  | 2,3  | BP          |
| FANCI       | Fanconi anemia, complementation group I             | Involved in homologous recombination and in interstrand DNA cross-links repair              | 0.04  | 1,7  | BP          |
| FCGR1C      | Fc fragment of IgG receptor, pseudogene             | Related immunoglobulin gamma Fc receptor gene C                                             | 0.04  | 2,3  | BP          |
| GPX1        | glutathione peroxidase 1                            | Antioxidant enzyme that detoxifies hydrogen peroxide                                        | 0.04  | 1,7  | BP          |
| MX1         | myxovirus resistance 1 p78                          | Interferon-inducible protein responsible for an antiviral state against influenza virus     | 0.04  | 2,3  | BP          |
| MX2         | myxovirus resistance 2                              | Member of both the dynamin family and the family of large GTPases                           | 0.04  | 1,9  | BP          |
| PTAFR       | platelet-activating factor receptor                 | Platelet-activating factor receptor that stimulates signal transduction pathways            | 0.04  | 1,6  | BP          |
| PTGS1       | prostaglandin-endoperoxide synthase 1               | Conversion of arachidonate to prostaglandin involved in angiogenesis                        | 0.04  | 1,8  | BP          |
| SOD2        | superoxide dismutase 2                              | Antioxidant, superoxide radicals dismutation into hydrogen peroxide and oxygen              | 0.04  | 1,7  | BP          |
| TNFSF4      | tumor necrosis factor superfamily, member 4         | Ligand for TNFRSF4/OX4 and is involved in T cell antigen-presenting cell interactions       | 0.04  | 1,8  | BP          |
| TRPA1       | transient receptor potential cation channel, A, 1   | May be involved in signal transduction and growth control                                   | 0.04  | 2,3  | BP          |
| CXCL16      | chemokine ligand 16                                 | Binds to oxidized low density lipoprotein and induces chemotactic and calcium mobilization  | 0.05  | 2,0  | BP          |
| ENTPD1      | ectonucleoside triphosphate diphosphohydrolase 1    | Hydrolyzes ATP and ADP                                                                      | 0.05  | 1,6  | BP          |
| ERO1L       | ERO1-like (S. cerevisiae)                           | Oxidoreductase that oxidizes in the endoplasmic reticulum, generating oxidative stress      | 0.05  | 1,7  | BP          |

| Gene Symbol | Gene name                                              | Function                                                                                         | P     | fold | included in |
|-------------|--------------------------------------------------------|--------------------------------------------------------------------------------------------------|-------|------|-------------|
| DUSP1       | dual specificity phosphatase 1                         | Phosphatase involved in cellular response to stress and cell proliferation                       | 0.002 | 4.1  | BP          |
| FAR2        | fatty acyl CoA reductase 2                             | Reductase enzyme involved in fatty acids into fatty alcohols                                     | 0.003 | 1.3  | BP, MF      |
| HSD17B7P2   | hydroxysteroid (17-beta) dehydrogenase 7 pseudogene 2  | Dehydrogenase implicated in de novo cholesterol synthesis                                        | 0.004 | 1.2  | MF          |
| DHCR7       | 7-dehydrocholesterol reductase                         | Conversion of 7-dehydrocholesterol to cholesterol                                                | 0.01  | 1.3  | BP, MF      |
| FOS         | FBJ murine osteosarcoma viral oncogene homolog         | Transcription factor in signal transduction, proliferation and transcriptomic response to stress | 0.01  | 4.0  | BP          |
| GPD2        | glycerol-3-phosphate dehydrogenase 2                   | Reoxidation of NADH formed during glycolysis                                                     | 0.01  | 1.2  | BP, MF      |
| GFER        | growth factor, augmenter of liver regeneration         | Homolog of yeast scERV1 essential for oxidative phosphorylation                                  | 0.02  | 1.2  | BP, MF      |
| PCYOX1      | prenylcysteine oxidase 1                               | Degradation of prenylcysteine to yield free cysteines and a hydrophobic isoprenoid product       | 0.02  | 1.2  | BP, MF      |
| RRM2B       | ribonucleotide reductase M2 B                          | Reduction of ribonucleoside diphosphates into deoxyribonucleoside diphosphates                   | 0.02  | 1.2  | BP, MF      |
| ATRN        | atractin                                               | Secreted chemotactic protein in inflammatory responses and energy homeostasis                    | 0.03  | 1.2  | BP          |
| CYP27A1     | cytochrome P450, family 27, subfamily A, polypeptide 1 | Monoxygenases in the bile synthesis pathway                                                      | 0.03  | 1.4  | BP, MF      |
| GCLM        | glutamate-cysteine ligase, modifier subunit            | First rate limiting enzyme of glutathione synthesis                                              | 0.03  | 1.4  | BP, MF      |
| HPGD        | hydroxyprostaglandin dehydrogenase                     | Alcohol dehydrogenase involved in the metabolism of prostaglandins                               | 0.03  | 1.7  | BP, MF      |
| ME1         | malic enzyme 1                                         | NADPH generation for fatty acid biosynthesis by oxidative decarboxylation of malate              | 0.03  | 1.6  | BP, MF      |
| OLR1        | oxidized low density lipoprotein receptor 1            | Scavenger receptor involved in oxidized low density lipoprotein degradation                      | 0.03  | 2.1  | BP          |
| SOD1        | superoxide dismutase 1                                 | Antioxidant, superoxide radicals dismutation into hydrogen peroxide and oxygen                   | 0.03  | 1.1  | BP, MF      |
| AIFM2       | apoptosis-inducing factor, mitochondrion-associated, 2 | Oxidoreductase that binds single stranded DNA                                                    | 0.04  | 1.2  | BP, MF      |
| CRYL1       | crystallin, lambda 1                                   | L-gulonate dehydrogenation in the uronate cycle, an alternative glucose metabolic pathway        | 0.04  | 1.2  | MF          |
| EPAS1       | endothelial PAS domain protein 1                       | Transcription factor involved in the induction of oxygen regulated genes                         | 0.04  | 1.4  | BP          |
| GCDH        | glutaryl-CoA dehydrogenase                             | Oxidative decarboxylation in the degradative of lysine and tryptophan metabolism                 | 0.04  | 1.2  | BP, MF      |
| HSD17B7     | hydroxysteroid (17-beta) dehydrogenase 7               | Biosynthesis of sex steroids and a reductase in the biosynthesis of cholesterol                  | 0.04  | 1.2  | BP, MF      |
| LOX         | lysyl oxidase                                          | Crosslinking of collagens and elastin by catalyzing oxidative deamination                        | 0.04  | 1.5  | BP, MF      |
| RETSAT      | retinol saturase                                       | Retinol saturase carrying out the saturation of all-trans-retinol                                | 0.04  | 1.3  | BP, MF      |
| SLC25A13    | solute carrier family 25 member 13                     | Exchange of aspartate for glutamate and a proton across the inner mitochondrial membrane         | 0.04  | 1.3  | BP          |
| SOD3        | superoxide dismutase 3                                 | Antioxidant, superoxide radicals dismutation into hydrogen peroxide and oxygen                   | 0.04  | 1.2  | BP, MF      |
| TP53I3      | tumor protein p53 inducible protein 3                  | Similar to oxidoreductases implicated in response to oxidative stress and irradiation            | 0.04  | 1.2  | BP, MF      |
| AKR1A1      | aldo-keto reductase family 1, member A1                | Aldehyde reductase involved in the reduction of biogenic and xenobiotic aldehydes                | 0.05  | 1.1  | BP, MF      |
| ALDH1A1     | aldehyde dehydrogenase 1 family, member A1             | Cytosolic aldehyde dehydrogenase in the major pathway of alcohol metabolism                      | 0.05  | 1.3  | BP, MF      |
| POR         | P450 (cytochrome) oxidoreductase                       | Endoplasmic reticulum membrane oxidoreductase                                                    | 0.05  | 1.2  | BP, MF      |
