# Supplementary material for: Chronic oxidative stress promotes H2AX protein degradation and enhances chemosensitivity in breast cancer patients
Source: PubMed Central journal article supplement (PMC5123617; doi:10.15252/emmm.201505891), 2016-03-22

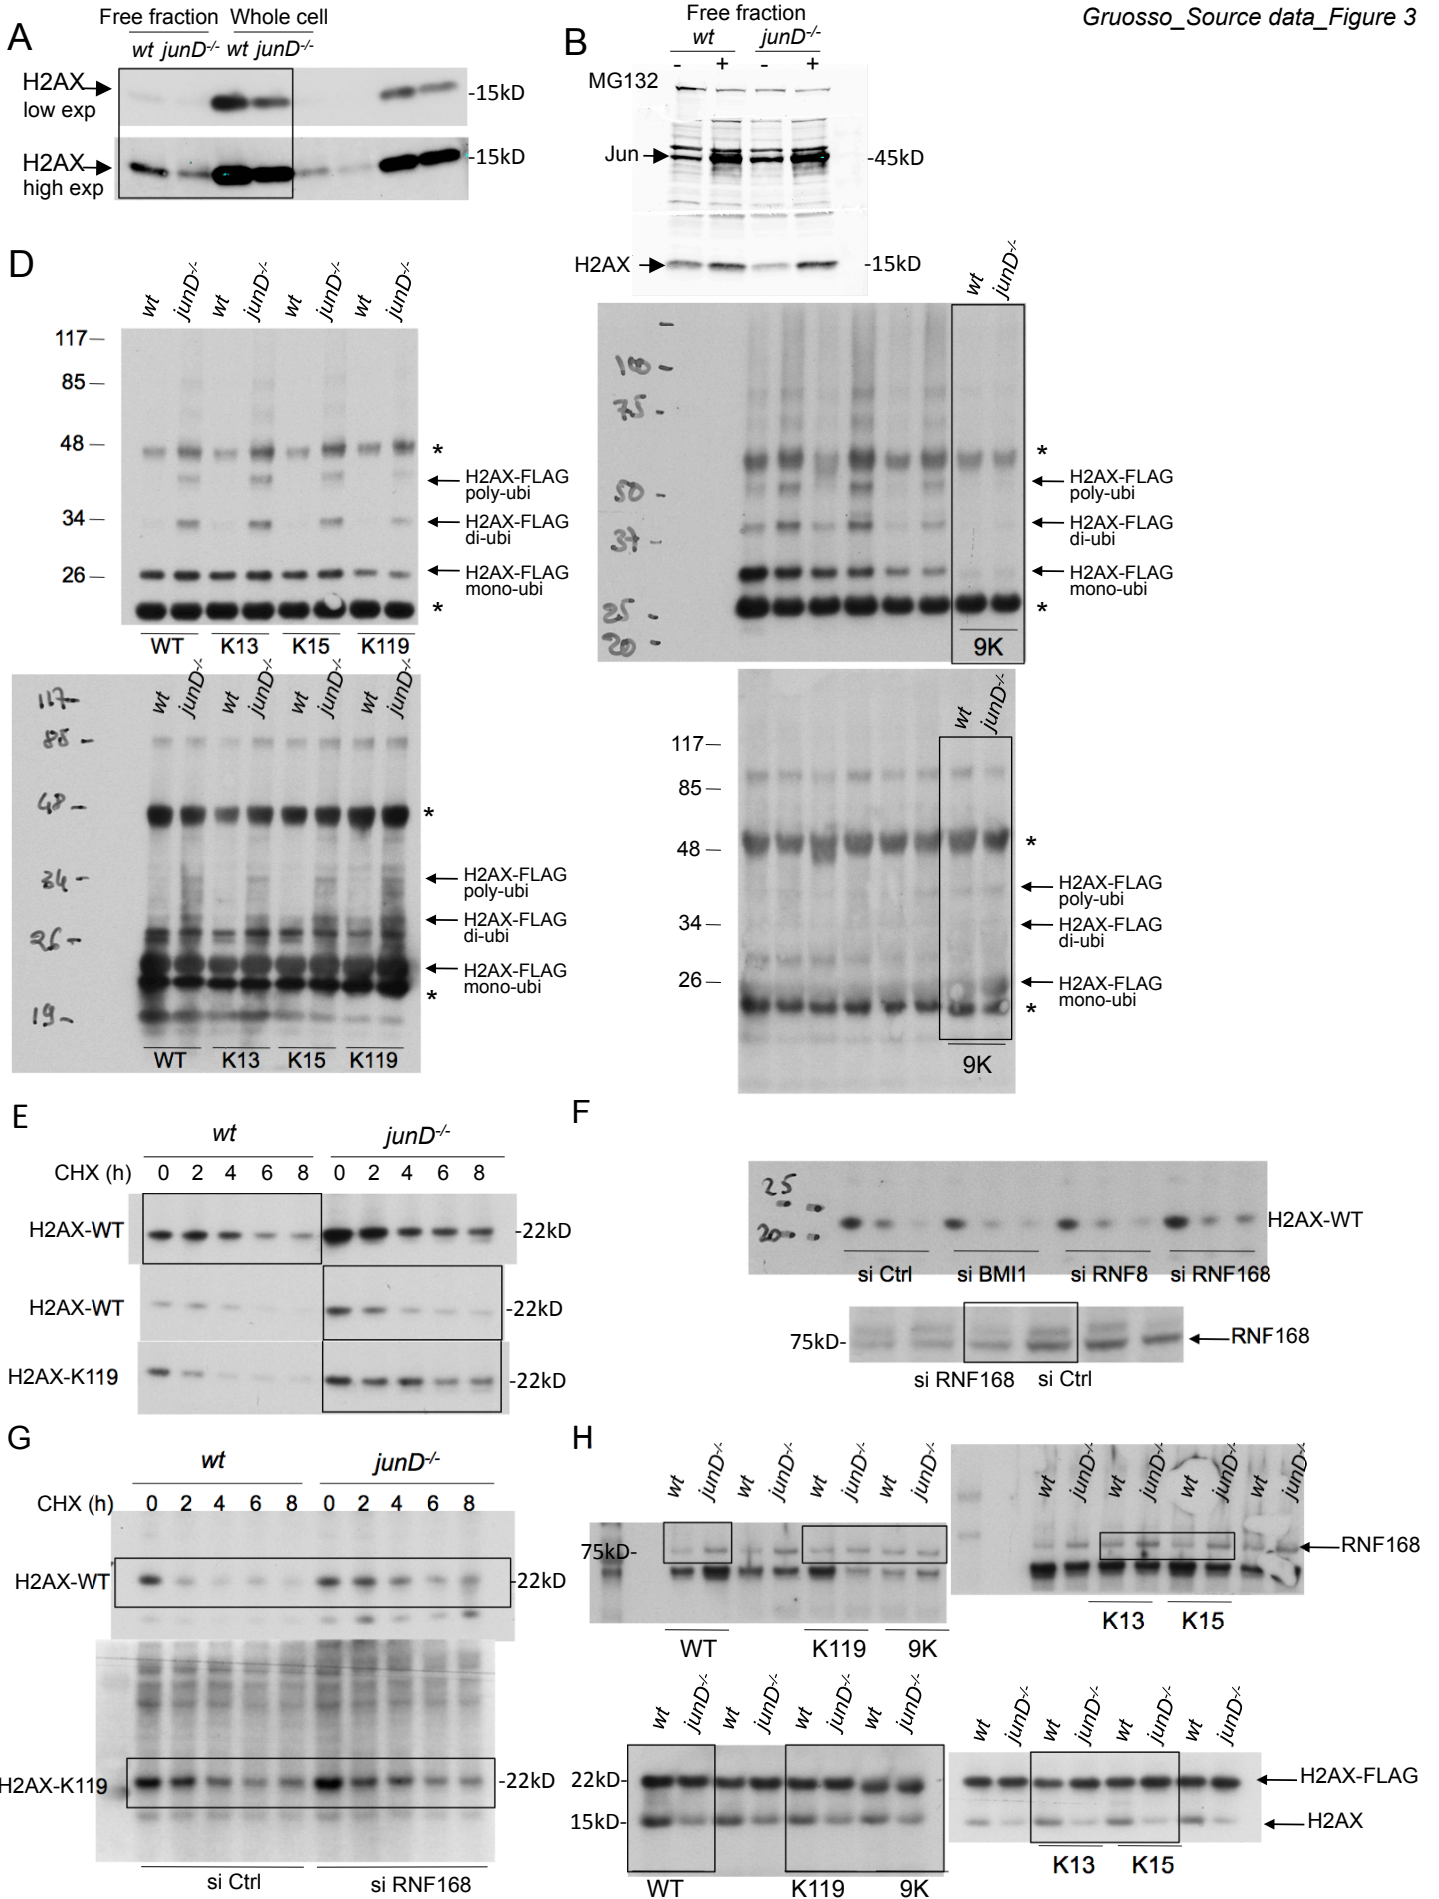

Supplement: EMMM-8-527-s003.pdf [file EMMM-8-527-s003.pdf]
